# Supplementary material
Source: MDPI journal article supplement (https://www.mdpi.com/2076-3417/14/3/999)
Supplement: s1 [file s1]

**Table S1.** Missing value imputation of sub-station rainfall data using DL methods.

| Sub-station           | Missing Gap | Model    | Error Rate |        |
|-----------------------|-------------|----------|------------|--------|
|                       |             |          | RMSE       | MAE    |
| St1_Bal - Balangoda   | I           | MLP      | 12.675     | 5.813  |
|                       | I           | CNN-LSTM | 17.330     | 7.682  |
| St5_Ker – Keragala    | II          | CNN-LSTM | 15.023     | 6.711  |
|                       | III         | MLP      | 18.566     | 9.658  |
|                       | IV          | RF       | 26.682     | 15.419 |
| St6_Mor – Moraliyoya  | I           | MLP      | 17.996     | 9.140  |
|                       | II          | MLP      | 16.289     | 6.807  |
|                       | III         | MLP      | 19.591     | 9.468  |
|                       | IV          | MLP      | 17.750     | 9.893  |
|                       | I           | MLP      | 15.550     | 6.790  |
| St3_Els - Elston      | II          | MLP      | 20.882     | 9.420  |
|                       | III         | MLP      | 19.674     | 8.609  |
|                       | IV          | MLP      | 7.921      | 3.886  |
|                       | V           | MLP      | 8.812      | 4.151  |
|                       | I           | NARX     | 17.962     | 14.242 |
| St4_Ill – Illumbuluwa | II          | MLP      | 22.855     | 14.276 |
|                       | III         | RF       | 18.851     | 11.344 |
|                       | IV          | CNN-LSTM | 15.832     | 7.991  |
|                       | V           | CNN      | 18.301     | 8.755  |

**Table S2.** Final optimal weights.

| Sample NO | Optimal Weights |          | Average RMSE | Sample NO | Optimal Weights |          | Average RMSE | Sample NO | Optimal Weights |          | Average RMSE |
|-----------|-----------------|----------|--------------|-----------|-----------------|----------|--------------|-----------|-----------------|----------|--------------|
|           | Wk              | Wm       |              |           | Wk              | Wm       |              |           | Wk              | Wm       |              |
| 1         | 0.50788         | 0.49212  | 12.832273    | 34        | 0.55234         | 0.44766  | 12.845423    | 67        | 0.05307         | 0.94693  | 13.87802     |
| 2         | 0.33345         | 0.66655  | 12.982911    | 35        | 0.58817         | 0.41183  | 12.871107    | 68        | 0.75277         | 0.24723  | 13.157194    |
| 3         | 0.32658         | 0.67342  | 12.995429    | 36        | 0.48689         | 0.51311  | 12.833319    | 69        | 0.80781         | 0.19219  | 13.311894    |
| 4         | 0.71415         | 0.28585  | 13.065896    | 37        | 0.47719         | 0.52281  | 12.83538     | 70        | 0.77552         | 0.22448  | 13.217703    |
| 5         | 0.67599         | 0.32401  | 12.989999    | 38        | 0.69604         | 0.30396  | 13.02808     | 71        | 0.18409         | 0.81591  | 13.36421     |
| 6         | 0.57279         | 0.42721  | 12.858441    | 39        | 0.62977         | 0.37023  | 12.917619    | 72        | 0.34669         | 0.65331  | 12.960203    |
| 7         | 0.18405         | 0.81595  | 13.364349    | 40        | 0.35810         | 0.64190  | 12.9421      | 73        | 0.11629         | 0.88371  | 13.610176    |
| 8         | 0.23123         | 0.76877  | 13.219478    | 41        | 0.60756         | 0.39244  | 12.890563    | 74        | 0.16099         | 0.83901  | 13.443097    |
| 9         | 0.54428         | 0.45572  | 12.841495    | 42        | 0.34632         | 0.65368  | 12.960802    | 75        | 0.89278         | 0.10722  | 13.605064    |
| 10        | 0.68708         | 0.31292  | 13.010561    | 43        | 0.76440         | 0.23560  | 13.187522    | 76        | 0.95929         | 0.04071  | 13.878051    |
| 11        | 0.50013         | 0.49987  | 12.83212     | 44        | 0.31649         | 0.68351  | 13.014698    | 77        | 0.26563         | 0.73437  | 13.127905    |
| 12        | 0.21979         | 0.78021  | 13.252579    | 45        | 0.82688         | 0.17312  | 13.372086    | 78        | 0.64279         | 0.35721  | 12.935818    |
| 13        | 0.72526         | 0.27474  | 13.09068     | 46        | 0.61184         | 0.38816  | 12.895381    | 79        | 0.44006         | 0.55994  | 12.852501    |
| 14        | 0.97799         | 0.02201  | 13.96137     | 47        | 0.22687         | 0.77313  | 13.23193     | 80        | 0.45437         | 0.54563  | 12.844165    |
| 15        | 0.22519         | 0.77481  | 13.236794    | 48        | 0.41338         | 0.58662  | 12.873848    | 81        | 0.99840         | 0.00160  | 14.055455    |
| 16        | 0.38771         | 0.61229  | 12.901522    | 49        | 0.54312         | 0.45688  | 12.840988    | 82        | 0.51505         | 0.48495  | 12.832984    |
| 17        | 0.89821         | 0.10179  | 13.625953    | 50        | 1.10415         | -0.10415 | 14.59333     | 83        | 1.25008         | -0.25008 | 15.461517    |
| 18        | 0.11357         | 0.88643  | 13.620956    | 51        | 0.25923         | 0.74077  | 13.144031    | 84        | 0.47620         | 0.52380  | 12.835647    |
| 19        | 0.53964         | 0.46036  | 12.839543    | 52        | 0.78015         | 0.21985  | 13.230606    | 85        | 0.39254         | 0.60746  | 12.895775    |
| 20        | 1.01585         | -0.01585 | 14.138467    | 53        | 0.24151         | 0.75849  | 13.981992    | 86        | 0.21632         | 0.78368  | 13.262878    |
| 21        | 0.54877         | 0.45123  | 12.843599    | 54        | 0.98253         | 0.01747  | 13.981992    | 87        | 0.38796         | 0.61204  | 12.901208    |
| 22        | 0.59137         | 0.40863  | 12.874048    | 55        | 0.34307         | 0.65693  | 12.96622     | 88        | 0.54684         | 0.45316  | 12.84267     |
| 23        | 0.32085         | 0.67915  | 13.006251    | 56        | 0.65496         | 0.34504  | 12.954394    | 89        | 0.25764         | 0.74236  | 13.148104    |
| 24        | 0.50866         | 0.49134  | 12.832324    | 57        | 0.99122         | 0.00878  | 14.021954    | 90        | 1.05862         | -0.05862 | 14.351699    |
| 25        | 0.64018         | 0.35982  | 12.932026    | 58        | 0.72911         | 0.27089  | 13.099546    | 91        | 0.87861         | 0.12139  | 13.551755    |
| 26        | 0.76150         | 0.23850  | 13.179836    | 59        | 0.53280         | 0.46720  | 12.837081    | 92        | 0.33005         | 0.66995  | 12.989049    |
| 27        | 0.59842         | 0.40158  | 12.88091     | 60        | 0.45727         | 0.54273  | 12.842742    | 93        | 0.16036         | 0.83964  | 13.445294    |
| 28        | 0.47760         | 0.52240  | 12.835272    | 61        | 0.80610         | 0.19390  | 13.306681    | 94        | 0.99213         | 0.00787  | 14.026185    |
| 29        | 0.20301         | 0.79699  | 13.303465    | 62        | 0.37530         | 0.62470  | 12.917395    | 95        | 0.35677         | 0.64323  | 12.944133    |
| 30        | 0.79214         | 0.20786  | 13.264985    | 63        | 0.49135         | 0.50865  | 12.832706    | 96        | 0.78583         | 0.21417  | 13.246724    |
| 31        | 0.85698         | 0.14302  | 13.473722    | 64        | 0.86342         | 0.13658  | 13.496535    | 97        | 0.92601         | 0.07399  | 13.73685     |
| 32        | 1.24059         | -0.24059 | 15.401001    | 65        | 0.69715         | 0.30285  | 13.030306    | 98        | 1.11667         | -0.11667 | 14.662352    |
| 33        | 0.84093         | 0.15907  | 13.418505    | 66        | 0.88585         | 0.11415  | 13.57879     | 99        | 0.23537         | 0.76463  | 13.207837    |
|           |                 |          |              |           |                 |          |              | 100       | 0.93884         | 0.06116  | 13.790228    |

**Table S3.** Comparison of prediction error of all models in validation under Subsection 3.4.2.

| Method                                 |         | Kriging |      |                    | MLP  |      |                    | Hybrid |      |                    | SPTK |      |                    |   |
|----------------------------------------|---------|---------|------|--------------------|------|------|--------------------|--------|------|--------------------|------|------|--------------------|---|
| Number of Stations with Missing Values | Station | RMSE    | MAE  | R <sup>2</sup> (%) | RMSE | MAE  | R <sup>2</sup> (%) | RMSE   | MAE  | R <sup>2</sup> (%) | RMSE | MAE  | R <sup>2</sup> (%) |   |
|                                        | 01      | St1_Bal | 6.6  | 3.5                | 4    | 3.0  | 1.7                | 37     | 3.9  | 2.4                | 14   | 25.1 | 17.8               | 2 |
|                                        |         | St2_Det | 8.7  | 5.2                | 6    | 3.7  | 1.7                | 49     | 5.9  | 3.4                | 19   | 26.0 | 19.3               | 2 |
|                                        |         | St3_Els | 6.9  | 3.6                | 42   | 7.4  | 2.9                | 39     | 6.9  | 3.2                | 45   | 25.3 | 18.3               | 0 |
|                                        |         | St4_Ill | 14.3 | 9.9                | 13   | 14.9 | 10.3               | 8      | 14.5 | 10.1               | 11   | 24.7 | 16.4               | 7 |
|                                        |         | St5_Ker | 13.8 | 8.5                | 8    | 11.7 | 5.9                | 21     | 11.5 | 6.6                | 16   | 25.9 | 17.9               | 1 |

|    |         |      |     |    |      |      |    |      |     |    |      |      |     |
|----|---------|------|-----|----|------|------|----|------|-----|----|------|------|-----|
| 02 | St6_Mor | 4.5  | 3.0 | 55 | 3.7  | 2.2  | 51 | 3.5  | 2.1 | 59 | 23.8 | 19.0 | 3   |
|    | St1_Bal | 8.1  | 4.2 | 12 | 4.0  | 2.2  | 29 | 4.9  | 2.7 | 26 | 26.0 | 19.8 | 32  |
|    | St2_Det | 9.4  | 5.9 | 5  | 5.7  | 2.6  | 41 | 7.2  | 4.2 | 18 | 28.6 | 21.1 | 1   |
|    | St1_Bal | 6.9  | 3.8 | 1  | 4.1  | 2.3  | 0  | 4.6  | 2.9 | 1  | 19.7 | 16.3 | 26  |
|    | St3_Els | 7.1  | 3.6 | 37 | 9.6  | 4.6  | 1  | 7.7  | 3.9 | 33 | 25.5 | 18.0 | 13  |
|    | St1_Bal | 5.7  | 2.6 | 3  | 3.3  | 1.7  | 25 | 3.6  | 1.9 | 15 | 27.8 | 19.8 | 29  |
|    | St4_Ill | 11.9 | 7.6 | 29 | 15.2 | 10.2 | 4  | 13.1 | 8.5 | 25 | 23.6 | 18.5 | 10  |
|    | St1_Bal | 3.8  | 2.3 | 45 | 3.1  | 1.7  | 31 | 2.9  | 1.7 | 43 | 26.1 | 19.8 | 32  |
|    | St5_Ker | 9.8  | 4.9 | 44 | 13.2 | 6.6  | 4  | 11.3 | 5.5 | 25 | 25.4 | 19.4 | 7   |
|    | St1_Bal | 7.3  | 4.1 | 8  | 2.9  | 1.6  | 55 | 4.0  | 2.5 | 18 | 23.3 | 19.7 | 13  |
|    | St6_Mor | 5.9  | 3.7 | 52 | 6.3  | 3.4  | 0  | 4.1  | 2.5 | 43 | 24.1 | 20.1 | 2   |
|    | St2_Det | 9.2  | 5.3 | 1  | 2.4  | 1.5  | 24 | 5.2  | 3.3 | 6  | 29.5 | 21.1 | 2   |
|    | St3_Els | 7.0  | 3.5 | 40 | 8.1  | 4.2  | 20 | 7.2  | 3.7 | 36 | 26.0 | 17.3 | 11  |
|    | St2_Det | 6.3  | 3.4 | 19 | 4.7  | 2.0  | 55 | 4.7  | 2.7 | 47 | 24.3 | 17.3 | 4   |
|    | St4_Ill | 11.9 | 7.6 | 28 | 14.1 | 9.6  | 18 | 12.9 | 8.4 | 25 | 21.7 | 17.1 | 9   |
|    | St2_Det | 4.4  | 2.6 | 64 | 5.1  | 2.7  | 6  | 3.9  | 2.5 | 42 | 30.2 | 21.0 | 3   |
|    | St5_Ker | 12.8 | 8.1 | 18 | 12.1 | 5.6  | 31 | 10.9 | 5.8 | 24 | 26.5 | 18.8 | 10  |
|    | St2_Det | 9.8  | 5.9 | 7  | 3.6  | 2.0  | 7  | 6.0  | 3.8 | 9  | 25.3 | 21.3 | 0   |
|    | St6_Mor | 5.5  | 3.8 | 53 | 4.8  | 2.9  | 32 | 3.6  | 2.0 | 54 | 24.0 | 20.1 | 2   |
|    | St3_Els | 7.0  | 3.4 | 76 | 9.6  | 4.5  | 24 | 8.2  | 3.9 | 53 | 25.4 | 17.0 | 1   |
|    | St4_Ill | 14.2 | 9.8 | 14 | 14.8 | 10.1 | 17 | 13.8 | 9.5 | 15 | 21.8 | 17.7 | 11  |
|    | St3_Els | 6.8  | 3.6 | 44 | 9.9  | 5.0  | 0  | 8.0  | 4.2 | 22 | 25.7 | 17.1 | 11  |
|    | St5_Ker | 12.4 | 7.3 | 16 | 12.6 | 5.4  | 45 | 11.0 | 5.6 | 25 | 25.6 | 19.1 | 8   |
|    | St3_Els | 7.7  | 4.4 | 27 | 9.2  | 4.6  | 6  | 8.0  | 4.2 | 24 | 23.0 | 18.5 | 1   |
|    | St6_Mor | 5.1  | 3.1 | 37 | 6.0  | 3.1  | 0  | 4.6  | 3.1 | 25 | 23.8 | 20.0 | 2   |
|    | St4_Ill | 13.7 | 9.0 | 17 | 13.9 | 9.3  | 25 | 13.8 | 9.1 | 22 | 22.4 | 18.1 | 11  |
|    | St5_Ker | 11.9 | 5.6 | 19 | 9.4  | 5.1  | 67 | 10.5 | 5.4 | 51 | 25.7 | 19.0 | 9   |
|    | St4_Ill | 14.4 | 9.8 | 14 | 14.6 | 9.8  | 11 | 13.9 | 9.5 | 13 | 18.6 | 16.7 | 1   |
|    | St6_Mor | 5.9  | 3.1 | 63 | 5.9  | 2.9  | 3  | 3.2  | 1.6 | 64 | 22.5 | 19.5 | 0   |
|    | St5_Ker | 13.4 | 8.3 | 11 | 12.7 | 5.6  | 58 | 11.6 | 6.3 | 16 | 29.1 | 25.5 | 0   |
|    | St6_Mor | 6.7  | 4.2 | 44 | 5.9  | 3.4  | 0  | 4.4  | 2.7 | 37 | 29.9 | 24.9 | 1   |
|    | St1_Bal | 9.1  | 4.9 | 7  | 8.3  | 4.4  | 4  | 7.5  | 3.8 | 0  | 33.8 | 21.2 | 4.4 |
|    | St2_Det | 10.3 | 6.5 | 0  | 2.4  | 1.2  | 7  | 5.8  | 3.8 | 2  | 34.4 | 22.2 | 2.4 |
|    | St3_Els | 8.3  | 5.0 | 33 | 8.7  | 4.4  | 15 | 7.9  | 4.2 | 27 | 34.0 | 21.5 | 1.9 |
| 03 | St1_Bal | 7.9  | 3.2 | 9  | 3.9  | 2.0  | 8  | 4.4  | 2.0 | 10 | 33.8 | 21.2 | 4.4 |
|    | St2_Det | 8.9  | 4.5 | 4  | 2.3  | 1.3  | 1  | 5.4  | 2.8 | 3  | 34.4 | 22.3 | 2.4 |
|    | St4_Ill | 12.0 | 7.9 | 25 | 14.7 | 10.0 | 13 | 13.0 | 8.4 | 22 | 27.9 | 16.4 | 7.3 |
|    | St1_Bal | 8.7  | 5.6 | 31 | 4.2  | 2.4  | 6  | 4.9  | 2.8 | 29 | 33.9 | 21.2 | 4.1 |
|    | St2_Det | 10.6 | 7.5 | 17 | 3.5  | 1.9  | 3  | 6.4  | 4.4 | 8  | 34.5 | 22.3 | 1.9 |
|    | St5_Ker | 10.7 | 6.4 | 30 | 13.1 | 5.4  | 10 | 10.8 | 5.2 | 29 | 34.4 | 22.1 | 1.2 |
|    | St1_Bal | 9.6  | 5.2 | 14 | 7.6  | 3.8  | 2  | 7.7  | 3.4 | 3  | 29.1 | 22.6 | 0.9 |
|    | St2_Det | 11.1 | 7.0 | 7  | 1.4  | 0.8  | 3  | 5.6  | 3.6 | 6  | 30.2 | 24.1 | 3.0 |
|    | St6_Mor | 7.4  | 5.3 | 54 | 4.9  | 2.8  | 19 | 4.5  | 2.9 | 49 | 28.1 | 21.9 | 0.1 |
|    | St2_Det | 6.2  | 3.3 | 3  | 1.6  | 1.0  | 3  | 3.5  | 1.9 | 1  | 34.4 | 22.2 | 2.4 |
|    | St3_Els | 6.9  | 3.3 | 41 | 8.6  | 3.8  | 14 | 7.5  | 3.4 | 33 | 34.0 | 21.5 | 1.9 |

|         |      |     |    |      |      |    |      |      |    |      |      |      |
|---------|------|-----|----|------|------|----|------|------|----|------|------|------|
| St4_Ill | 13.0 | 8.7 | 19 | 14.3 | 9.4  | 16 | 13.6 | 8.9  | 19 | 27.9 | 16.4 | 7.3  |
| St2_Det | 6.7  | 4.7 | 16 | 2.9  | 1.5  | 0  | 4.3  | 3.0  | 8  | 34.4 | 22.3 | 2.3  |
| St3_Els | 7.5  | 4.7 | 32 | 9.7  | 4.7  | 1  | 8.1  | 4.4  | 20 | 34.0 | 21.5 | 1.9  |
| St5_Ker | 10.5 | 5.2 | 32 | 12.1 | 5.5  | 13 | 11.0 | 5.0  | 27 | 34.4 | 22.2 | 1.4  |
| St2_Det | 10.6 | 6.4 | 1  | 1.4  | 0.7  | 14 | 5.5  | 3.4  | 3  | 30.1 | 24.1 | 2.6  |
| St3_Els | 8.5  | 5.0 | 28 | 9.0  | 3.6  | 16 | 7.4  | 3.9  | 32 | 28.0 | 21.1 | 0.3  |
| St6_Mor | 6.6  | 4.4 | 41 | 3.4  | 2.2  | 66 | 4.3  | 2.6  | 58 | 28.4 | 22.0 | 0.2  |
| St1_Bal | 5.4  | 2.4 | 4  | 4.3  | 2.5  | 0  | 4.6  | 2.3  | 2  | 33.7 | 21.2 | 4.4  |
| St3_Els | 6.9  | 3.0 | 42 | 9.7  | 4.4  | 0  | 7.9  | 3.6  | 31 | 34.0 | 21.5 | 1.9  |
| St4_Ill | 13.7 | 9.3 | 14 | 14.6 | 10.1 | 25 | 14.0 | 9.5  | 18 | 27.9 | 16.4 | 7.3  |
| St3_Els | 6.6  | 3.1 | 50 | 9.0  | 3.9  | 90 | 7.5  | 3.5  | 62 | 34.0 | 21.5 | 1.9  |
| St4_Ill | 14.0 | 9.5 | 15 | 15.1 | 10.2 | 10 | 14.5 | 9.8  | 14 | 27.9 | 16.4 | 7.3  |
| St5_Ker | 10.2 | 4.6 | 69 | 13.6 | 6.1  | 3  | 11.8 | 5.4  | 62 | 34.4 | 22.2 | 1.4  |
| St3_Els | 7.5  | 3.9 | 36 | 9.6  | 4.0  | 1  | 7.6  | 3.4  | 35 | 28.1 | 21.2 | 0.2  |
| St4_Ill | 14.1 | 9.6 | 15 | 14.3 | 9.5  | 16 | 13.6 | 9.4  | 16 | 21.7 | 14.8 | 14.4 |
| St6_Mor | 5.3  | 3.0 | 63 | 3.7  | 1.8  | 60 | 3.7  | 2.2  | 63 | 28.4 | 22.1 | 0.2  |
| St1_Bal | 3.1  | 1.6 | 42 | 3.6  | 2.0  | 14 | 2.8  | 1.4  | 47 | 30.3 | 20.4 | 5.7  |
| St4_Ill | 14.2 | 9.2 | 11 | 15.6 | 10.8 | 10 | 14.7 | 10.0 | 13 | 27.3 | 16.2 | 8.0  |
| St5_Ker | 11.0 | 5.6 | 36 | 13.3 | 6.4  | 2  | 12.1 | 6.0  | 19 | 34.1 | 22.1 | 1.3  |
| St2_Det | 4.7  | 2.6 | 62 | 2.6  | 1.3  | 46 | 3.5  | 1.8  | 61 | 31.1 | 21.5 | 3.4  |
| St4_Ill | 13.9 | 9.2 | 12 | 14.8 | 9.8  | 6  | 14.3 | 9.5  | 9  | 27.4 | 16.2 | 8.0  |
| St5_Ker | 11.8 | 5.6 | 17 | 13.8 | 6.1  | 1  | 12.6 | 5.8  | 16 | 34.3 | 22.2 | 1.4  |
| St4_Ill | 13.6 | 8.7 | 16 | 15.1 | 10.1 | 9  | 14.2 | 9.2  | 15 | 30.8 | 19.4 | 6.2  |
| St5_Ker | 10.7 | 5.5 | 34 | 13.7 | 6.2  | 0  | 12.0 | 5.8  | 22 | 37.9 | 25.7 | 2.1  |
| St6_Mor | 4.9  | 2.4 | 56 | 5.3  | 2.7  | 28 | 4.7  | 2.3  | 45 | 37.7 | 24.5 | 5.9  |
| St1_Bal | 5.0  | 2.8 | 30 | 3.1  | 2.0  | 34 | 3.5  | 2.3  | 36 | 33.2 | 28.0 | 0.3  |
| St5_Ker | 11.1 | 5.9 | 21 | 11.6 | 5.7  | 59 | 10.9 | 5.4  | 35 | 32.0 | 26.7 | 1.8  |
| St6_Mor | 5.7  | 3.9 | 30 | 5.4  | 3.2  | 7  | 4.6  | 2.8  | 27 | 33.5 | 27.8 | 0.1  |
| St2_Det | 7.4  | 5.1 | 26 | 2.6  | 1.5  | 0  | 4.5  | 3.1  | 18 | 35.0 | 29.8 | 2.8  |
| St5_Ker | 11.3 | 6.0 | 19 | 12.4 | 5.3  | 14 | 11.3 | 5.4  | 23 | 32.0 | 26.7 | 1.8  |
| St6_Mor | 7.7  | 5.0 | 25 | 4.2  | 2.1  | 53 | 4.6  | 2.9  | 36 | 33.6 | 27.8 | 0.1  |
| St3_Els | 9.2  | 5.8 | 13 | 7.7  | 3.9  | 42 | 7.6  | 4.3  | 28 | 32.6 | 26.2 | 0.7  |
| St5_Ker | 12.9 | 8.0 | 17 | 13.8 | 6.1  | 1  | 11.6 | 5.9  | 14 | 31.9 | 26.6 | 1.8  |
| St6_Mor | 7.6  | 5.1 | 8  | 5.7  | 3.8  | 3  | 5.9  | 3.8  | 7  | 33.3 | 27.7 | 0.1  |
| St1_Bal | 7.6  | 4.2 | 1  | 4.0  | 2.1  | 6  | 5.3  | 3.0  | 2  | 28.9 | 22.6 | 0.8  |
| St3_Els | 7.9  | 4.3 | 29 | 8.4  | 3.8  | 28 | 7.5  | 3.7  | 33 | 28.0 | 21.0 | 0.3  |
| St6_Mor | 5.8  | 3.8 | 42 | 4.4  | 2.4  | 37 | 4.2  | 2.6  | 43 | 28.5 | 22.0 | 0.2  |
| St1_Bal | 5.6  | 2.3 | 12 | 3.9  | 2.2  | 2  | 3.9  | 2.1  | 11 | 28.9 | 22.5 | 0.8  |
| St4_Ill | 13.3 | 8.7 | 18 | 15.3 | 10.5 | 20 | 14.0 | 9.4  | 20 | 28.0 | 21.1 | 14.5 |
| St6_Mor | 4.8  | 2.5 | 62 | 5.5  | 2.7  | 26 | 3.2  | 1.7  | 64 | 28.4 | 22.0 | 0.2  |
| St1_Bal | 5.0  | 2.9 | 17 | 4.3  | 2.5  | 0  | 3.8  | 2.5  | 10 | 28.3 | 22.2 | 4.3  |
| St3_Els | 7.7  | 4.5 | 28 | 9.8  | 5.1  | 2  | 8.3  | 4.5  | 16 | 21.6 | 14.7 | 1.8  |
| St5_Ker | 10.5 | 5.2 | 35 | 11.2 | 4.9  | 56 | 10.6 | 4.7  | 52 | 29.0 | 22.3 | 1.3  |
| St2_Det | 6.9  | 3.7 | 14 | 1.5  | 0.9  | 2  | 3.6  | 2.0  | 11 | 33.5 | 21.2 | 2.4  |
| St4_Ill | 12.6 | 8.1 | 22 | 14.8 | 9.9  | 6  | 13.3 | 8.7  | 20 | 34.2 | 21.4 | 14.5 |

|    |         |      |      |    |      |      |    |      |      |    |      |      |      |
|----|---------|------|------|----|------|------|----|------|------|----|------|------|------|
| 04 | St6_Mor | 3.8  | 2.2  | 70 | 3.8  | 1.9  | 57 | 2.9  | 1.3  | 71 | 34.6 | 22.2 | 0.2  |
|    | St2_Det | 3.9  | 2.4  | 21 | 0.8  | 0.3  | 45 | 1.9  | 1.1  | 23 | 13.8 | 10.7 | 3.1  |
|    | St3_Els | 6.9  | 3.4  | 58 | 8.6  | 3.6  | 33 | 7.6  | 3.5  | 60 | 12.6 | 9.1  | 6.9  |
|    | St4_Ill | 13.9 | 9.5  | 16 | 14.8 | 9.9  | 9  | 14.3 | 9.7  | 14 | 7.4  | 5.2  | 61.4 |
|    | St5_Ker | 11.2 | 4.7  | 38 | 12.8 | 5.5  | 17 | 12.0 | 5.1  | 35 | 12.4 | 9.5  | 21.3 |
|    | St2_Det | 7.6  | 3.9  | 1  | 1.6  | 0.8  | 2  | 4.3  | 2.2  | 2  | 21.9 | 17.4 | 4.8  |
|    | St3_Els | 7.5  | 3.9  | 33 | 9.1  | 3.9  | 6  | 7.9  | 3.7  | 25 | 19.4 | 15.0 | 5.2  |
|    | St4_Ill | 12.6 | 8.4  | 23 | 15.6 | 10.9 | 3  | 13.8 | 9.4  | 18 | 11.3 | 8.7  | 51.9 |
|    | St6_Mor | 4.3  | 2.6  | 59 | 5.6  | 2.9  | 12 | 3.5  | 2.1  | 58 | 19.7 | 15.7 | 2.9  |
|    | St2_Det | 9.2  | 6.5  | 13 | 1.6  | 0.8  | 39 | 5.1  | 3.6  | 20 | 27.0 | 22.4 | 4.9  |
|    | St3_Els | 9.0  | 5.9  | 17 | 8.7  | 3.9  | 18 | 7.9  | 4.4  | 23 | 25.1 | 19.4 | 0.2  |
|    | St5_Ker | 11.8 | 6.2  | 14 | 13.3 | 5.7  | 1  | 12.0 | 5.1  | 11 | 25.2 | 20.9 | 0.3  |
|    | St6_Mor | 8.1  | 5.7  | 8  | 5.4  | 2.3  | 9  | 5.5  | 3.5  | 11 | 25.5 | 20.7 | 0.9  |
|    | St2_Det | 5.4  | 2.9  | 51 | 2.2  | 1.0  | 1  | 3.4  | 1.8  | 34 | 16.7 | 12.8 | 5.2  |
|    | St4_Ill | 13.5 | 8.9  | 16 | 15.3 | 10.5 | 22 | 14.2 | 9.4  | 20 | 8.4  | 5.9  | 56.9 |
|    | St5_Ker | 11.7 | 5.6  | 17 | 13.7 | 6.2  | 0  | 12.5 | 5.9  | 10 | 15.8 | 12.4 | 10.9 |
|    | St6_Mor | 4.6  | 2.2  | 41 | 5.7  | 2.7  | 7  | 4.7  | 2.4  | 29 | 16.8 | 12.2 | 0.9  |
|    | St3_Els | 8.7  | 4.2  | 23 | 10.0 | 4.6  | 2  | 9.3  | 4.4  | 12 | 9.6  | 4.8  | 0.1  |
|    | St4_Ill | 15.1 | 10.2 | 13 | 15.6 | 10.6 | 8  | 15.3 | 10.4 | 15 | 14.6 | 10.3 | 35.0 |
|    | St5_Ker | 13.4 | 5.6  | 0  | 13.8 | 6.0  | 1  | 13.6 | 5.8  | 0  | 13.4 | 5.8  | 0.1  |
|    | St6_Mor | 5.6  | 2.8  | 4  | 6.1  | 3.1  | 1  | 5.7  | 2.9  | 4  | 5.9  | 3.5  | 1.6  |
|    | St1_Bal | 9.0  | 3.7  | 1  | 4.3  | 2.4  | 0  | 5.3  | 2.7  | 1  | 12.3 | 9.7  | 0.8  |
|    | St2_Det | 9.5  | 4.3  | 0  | 1.2  | 0.5  | 24 | 4.9  | 2.4  | 0  | 13.6 | 10.7 | 2.6  |
|    | St3_Els | 8.0  | 4.1  | 33 | 8.4  | 3.6  | 58 | 7.2  | 3.1  | 38 | 12.6 | 9.4  | 5.4  |
|    | St4_Ill | 13.4 | 9.5  | 15 | 15.0 | 9.9  | 6  | 14.0 | 9.7  | 12 | 7.2  | 5.0  | 63.3 |
|    | St1_Bal | 8.2  | 5.0  | 15 | 4.2  | 2.4  | 0  | 4.7  | 2.8  | 11 | 12.3 | 9.7  | 0.9  |
|    | St2_Det | 9.8  | 6.9  | 4  | 5.0  | 1.8  | 0  | 6.5  | 4.2  | 1  | 13.6 | 10.7 | 2.6  |
|    | St3_Els | 8.3  | 5.5  | 30 | 9.4  | 4.4  | 3  | 7.9  | 4.3  | 23 | 12.6 | 9.4  | 5.4  |
|    | St5_Ker | 9.9  | 5.6  | 38 | 13.2 | 5.9  | 4  | 10.8 | 4.9  | 35 | 12.7 | 9.7  | 17.3 |
|    | St1_Bal | 11.8 | 6.8  | 7  | 4.0  | 2.2  | 6  | 6.6  | 3.9  | 8  | 20.6 | 16.5 | 0.0  |
|    | St2_Det | 13.2 | 8.4  | 0  | 1.7  | 0.7  | 20 | 7.2  | 4.5  | 1  | 22.0 | 17.5 | 5.1  |
|    | St3_Els | 10.6 | 6.9  | 24 | 8.3  | 3.9  | 21 | 7.5  | 4.4  | 33 | 19.7 | 15.2 | 4.8  |
|    | St6_Mor | 9.8  | 6.5  | 39 | 5.5  | 2.8  | 7  | 5.4  | 3.4  | 35 | 20.1 | 15.9 | 2.9  |
|    | St1_Bal | 6.3  | 3.2  | 15 | 4.3  | 2.4  | 1  | 4.3  | 2.0  | 10 | 12.3 | 9.8  | 0.8  |
|    | St2_Det | 7.1  | 3.7  | 17 | 2.1  | 1.0  | 0  | 4.4  | 2.2  | 11 | 13.6 | 10.7 | 2.9  |
|    | St4_Ill | 13.7 | 8.8  | 11 | 14.9 | 10.0 | 13 | 14.1 | 9.1  | 13 | 7.3  | 5.3  | 62.2 |
|    | St5_Ker | 10.1 | 5.3  | 39 | 12.9 | 5.9  | 28 | 11.2 | 5.5  | 38 | 12.8 | 9.7  | 16.8 |
|    | St1_Bal | 9.5  | 3.6  | 7  | 5.5  | 3.1  | 3  | 6.7  | 2.6  | 2  | 22.0 | 16.9 | 1.0  |
|    | St2_Det | 10.3 | 4.9  | 4  | 1.4  | 0.7  | 6  | 5.6  | 2.7  | 5  | 23.0 | 17.9 | 6.3  |
|    | St4_Ill | 12.9 | 8.6  | 19 | 15.2 | 10.4 | 12 | 13.4 | 8.7  | 19 | 11.9 | 9.7  | 53.0 |
|    | St6_Mor | 5.9  | 3.0  | 72 | 3.5  | 1.5  | 61 | 3.5  | 1.7  | 73 | 19.1 | 15.3 | 2.8  |
|    | St1_Bal | 3.7  | 2.1  | 10 | 3.8  | 2.3  | 7  | 3.7  | 2.0  | 10 | 12.3 | 9.7  | 0.9  |
|    | St3_Els | 7.5  | 3.4  | 60 | 9.1  | 4.1  | 49 | 8.3  | 3.7  | 58 | 12.9 | 9.6  | 3.6  |
|    | St4_Ill | 14.8 | 10.3 | 9  | 15.5 | 10.8 | 4  | 15.2 | 10.5 | 7  | 7.3  | 5.3  | 61.9 |
|    | St5_Ker | 11.5 | 5.2  | 52 | 13.5 | 5.8  | 13 | 12.5 | 5.5  | 49 | 12.9 | 9.8  | 15.7 |

|         |      |     |    |      |      |    |      |     |    |      |      |      |
|---------|------|-----|----|------|------|----|------|-----|----|------|------|------|
| St1_Bal | 6.8  | 2.8 | 2  | 4.6  | 2.8  | 2  | 5.2  | 2.7 | 0  | 20.5 | 16.4 | 0.0  |
| St3_Els | 7.9  | 3.6 | 27 | 9.8  | 4.4  | 0  | 8.3  | 3.8 | 24 | 19.4 | 15.0 | 5.1  |
| St4_Ill | 13.5 | 9.2 | 17 | 15.0 | 10.3 | 17 | 14.1 | 9.5 | 18 | 11.3 | 8.7  | 52.2 |
| St6_Mor | 4.0  | 2.5 | 59 | 6.0  | 3.0  | 0  | 3.7  | 2.2 | 60 | 19.7 | 15.7 | 2.9  |
| St1_Bal | 4.2  | 2.4 | 24 | 4.1  | 2.2  | 0  | 3.4  | 2.0 | 20 | 15.4 | 12.0 | 0.1  |
| St4_Ill | 14.3 | 9.3 | 12 | 15.2 | 10.4 | 24 | 14.6 | 9.7 | 15 | 8.4  | 5.9  | 57.0 |
| St5_Ker | 11.8 | 6.1 | 20 | 11.5 | 5.3  | 70 | 11.5 | 5.7 | 41 | 15.7 | 12.3 | 11.3 |
| St6_Mor | 4.1  | 1.9 | 46 | 6.0  | 2.9  | 1  | 4.4  | 2.0 | 45 | 16.6 | 12.1 | 1.1  |
| St1_Bal | 9.3  | 5.9 | 24 | 5.4  | 3.0  | 1  | 5.6  | 3.4 | 18 | 26.0 | 21.5 | 4.5  |
| St2_Det | 11.1 | 7.5 | 18 | 1.5  | 0.8  | 2  | 5.7  | 3.9 | 15 | 27.0 | 22.4 | 4.9  |
| St5_Ker | 10.9 | 6.5 | 28 | 13.5 | 5.8  | 0  | 11.1 | 5.4 | 25 | 25.2 | 20.9 | 0.4  |
| St6_Mor | 8.5  | 6.0 | 31 | 4.8  | 2.4  | 55 | 4.6  | 3.0 | 38 | 25.5 | 20.6 | 0.9  |
| St1_Bal | 6.6  | 4.1 | 18 | 4.5  | 2.7  | 0  | 4.3  | 2.7 | 12 | 26.1 | 21.4 | 4.6  |
| St3_Els | 8.8  | 5.3 | 14 | 9.7  | 4.7  | 0  | 8.7  | 4.8 | 8  | 25.1 | 19.4 | 0.2  |
| St5_Ker | 11.6 | 6.1 | 15 | 13.6 | 5.8  | 0  | 12.1 | 5.2 | 12 | 25.2 | 20.8 | 0.5  |
| St6_Mor | 7.3  | 4.9 | 8  | 6.1  | 3.5  | 1  | 5.6  | 3.4 | 5  | 25.5 | 20.7 | 0.7  |
